# Supplementary material
Source: Springer Nature journal article supplement (https://www.springermedizin.de/resource/supplementary/12957_2011_796_MOESM3_ESM.pdf/9565900)

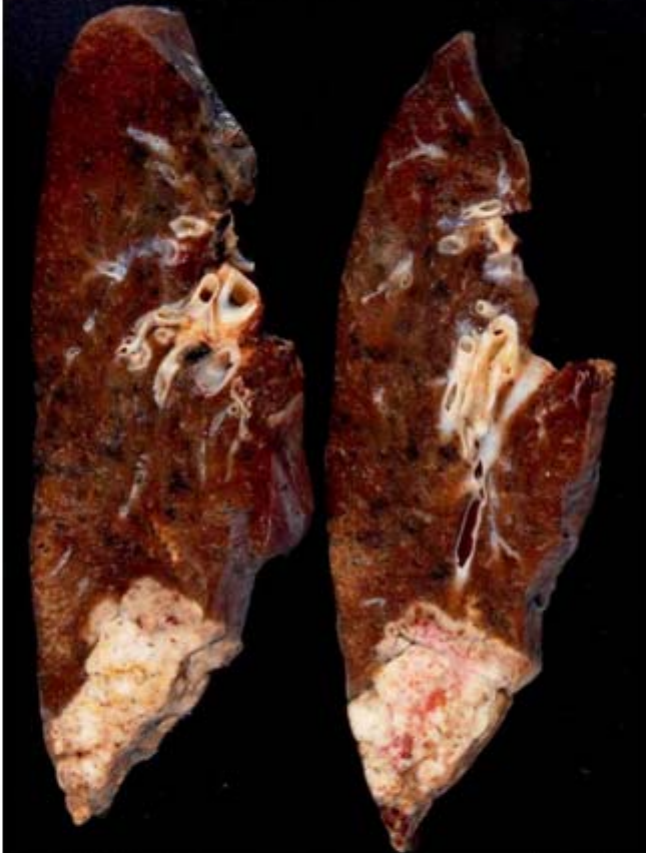

20

P1001966

30

Supplement: MOESM3 [file 9565900]
